# Supplementary material for: Predictive utility of ANCA positivity and antigen specificity in the assessment of kidney disease in paediatric-onset small vessel vasculitis
Source: PubMed Central journal article supplement (PMC11184192; doi:10.1136/rmdopen-2024-004315), 2024-06-17
Supplement: rmdopen-2024-004315supp001.pdf [file rmdopen-2024-004315supp001.pdf]

## SUPPLEMENTAL MATERIAL

**Supplementary Table 1. Differences in overall disease activity (total pVAS) at diagnosis between pediatric-onset small vessel vasculitis stratified by ANCA status.**

|                                 | Mean Total pVAS ± SD      | Mean Difference (95% CI) | P-value |
|---------------------------------|---------------------------|--------------------------|---------|
| ANCA-Positive vs. ANCA-Negative | 18.3 ± 7.7 vs. 11.7 ± 7.5 | 6.67 (4.17, 9.16)        | <0.001  |
| MPO-ANCA vs. ANCA-Negative      | 17.2 ± 6.4 vs. 11.7 ± 7.5 | 5.91 (3.17, 8.65)        | <0.001  |
| PR3-ANCA vs. ANCA-Negative      | 19.0 ± 8.2 vs. 11.7 ± 7.5 | 7.06 (4.50, 9.62)        | <0.001  |
| PR3-ANCA vs. MPO-ANCA           | 19.0 ± 8.2 vs. 17.2 ± 6.4 | 1.15 (-0.59, 2.89)       | 0.195   |

**Supplementary Table 2. Treatment for remission-induction in pediatric-onset small vessel vasculitis stratified by ANCA status.**

|                  | ANCA Status      |                           |                       |                       | PR3-ANCA vs. MPO-ANCA |         |
|------------------|------------------|---------------------------|-----------------------|-----------------------|-----------------------|---------|
|                  | All<br>(n = 384) | ANCA-negative<br>(n = 40) | MPO-ANCA<br>(n = 121) | PR3-ANCA<br>(n = 223) | Adjusted OR (95% CI)  | P-value |
| Cyclophosphamide | 243 (63.3)       | 12 (30.0)                 | 78 (64.5)             | 153 (68.6)            | 1.20 (0.75, 1.92)     | 0.434   |
| Rituximab        | 78 (20.3)        | 2 (5.0)                   | 30 (24.8)             | 46 (20.6)             | 0.79 (0.47, 1.34)     | 0.374   |
| Azathioprine     | 11 (2.9)         | 1 (2.5)                   | 3 (2.5)               | 7 (3.1)               | 1.27 (0.35, 6.00)     | 0.729   |
| Methotrexate     | 51 (13.3)        | 8 (20.0)                  | 11 (9.1)              | 32 (14.3)             | 1.68 (0.84, 3.60)     | 0.162   |

Data are presented as the absolute number (%) of individuals in a given category.

Abbreviations: OR: odds ratio, CI: confidence interval

**Supplementary Table 3. Treatment for remission-maintenance (1-year) in pediatric-onset small vessel vasculitis stratified by ANCA status.**

|                  | ANCA Status      |                           |                      |                       | PR3-ANCA vs. MPO-ANCA    |              |
|------------------|------------------|---------------------------|----------------------|-----------------------|--------------------------|--------------|
|                  | All<br>(n = 223) | ANCA-negative<br>(n = 15) | MPO-ANCA<br>(n = 79) | PR3-ANCA<br>(n = 129) | Adjusted OR (95% CI)     | P-value      |
| Cyclophosphamide | 51 (22.9)        | 3 (20.0)                  | 21 (26.6)            | 27 (20.9)             | 0.73 (0.38, 1.42)        | 0.349        |
| Rituximab        | 54 (24.2)        | 3 (20.0)                  | 24 (30.4)            | 27 (20.9)             | 0.61 (0.32, 1.15)        | 0.126        |
| Azathioprine     | 87 (39.0)        | 4 (26.7)                  | 26 (32.9)            | 57 (44.2)             | 1.61 (0.91, 2.92)        | 0.108        |
| Methotrexate     | 42 (18.8)        | 5 (33.3)                  | 8 (10.1)             | 29 (22.5)             | <b>2.57 (1.16, 6.34)</b> | <b>0.027</b> |

Data are presented as the absolute number (%) of individuals in a given category.

Abbreviations: OR: odds ratio, CI: confidence interval

**Supplementary Table 4. Organ involvement and clinical characteristics associated with ANCA type in pediatric-onset small vessel vasculitis at diagnosis.**

|                                 | % (n)                     |                       |                       | Logistic Regression Model |                  |                           |              |                          |                  |
|---------------------------------|---------------------------|-----------------------|-----------------------|---------------------------|------------------|---------------------------|--------------|--------------------------|------------------|
|                                 |                           |                       |                       | PR3-ANCA vs ANCA-Negative |                  | MPO-ANCA vs ANCA-Negative |              | MPO-ANCA vs PR3-ANCA     |                  |
|                                 | ANCA-Negative<br>(n = 40) | MPO-ANCA<br>(n = 126) | PR3-ANCA<br>(n = 232) | Adjusted OR (95% CI)      | P-value          | Adjusted OR (95% CI)      | P-value      | Adjusted OR (95% CI)     | P-value          |
| Constitutional involvement      | 47.5 (19)                 | 62.7 (79)             | 76.7 (178)            | <b>3.77 (1.88, 7.62)</b>  | <b>&lt;0.001</b> | 1.82 (0.88, 3.79)         | 0.109        | <b>0.48 (0.29, 0.80)</b> | <b>0.004</b>     |
| Myalgia                         | 12.5 (5)                  | 15.9 (20)             | 16.8 (39)             | 1.41 (0.56, 4.33)         | 0.475            | 1.47 (0.54, 4.73)         | 0.475        | 1.04 (0.55, 1.92)        | 0.893            |
| Arthralgia or arthritis         | 42.5 (17)                 | 38.1 (48)             | 60.8 (141)            | <b>2.22 (1.12, 4.47)</b>  | <b>0.023</b>     | 0.88 (0.42, 1.84)         | 0.722        | <b>0.39 (0.24, 0.63)</b> | <b>&lt;0.001</b> |
| Fever ≥ 38°C                    | 27.5 (11)                 | 23.0 (29)             | 32.8 (76)             | 1.28 (0.62, 2.82)         | 0.522            | 0.68 (0.30, 1.60)         | 0.366        | <b>0.53 (0.31, 0.90)</b> | <b>0.021</b>     |
| Weight loss ≥ 5% of body weight | 15.0 (6)                  | 29.4 (37)             | 43.1 (100)            | <b>4.19 (1.80, 11.48)</b> | <b>0.002</b>     | <b>2.70 (1.09, 7.68)</b>  | <b>0.043</b> | <b>0.64 (0.39, 1.04)</b> | <b>0.075</b>     |

|                                                                           |           |           |            |                              |                  |                              |              |                          |                  |
|---------------------------------------------------------------------------|-----------|-----------|------------|------------------------------|------------------|------------------------------|--------------|--------------------------|------------------|
| Cutaneous involvement                                                     | 37.5 (15) | 31.0 (39) | 46.1 (107) | 1.46 (0.74, 2.99)            | 0.281            | 0.77 (0.37, 1.67)            | 0.506        | <b>0.53 (0.32, 0.85)</b> | <b>0.009</b>     |
| Polymorphous exanthema                                                    | 2.5 (1)   | 4.8 (6)   | 9.5 (22)   | 4.10 (0.82, 74.62)           | 0.174            | 1.82 (0.29, 35.24)           | 0.587        | 0.44 (0.15, 1.12)        | 0.104            |
| Livedo                                                                    | 0.0 (0)   | 3.2 (4)   | 2.6 (6)    | -                            | -                | -                            | -            | 0.89 (0.21, 3.31)        | 0.858            |
| Panniculitis                                                              | 7.5 (3)   | 3.2 (4)   | 0.4 (1)    | <b>0.06 (2.80e-03, 0.47)</b> | <b>0.015</b>     | 0.46 (0.09, 2.50)            | 0.337        | 8.00 (1.12, 160.57)      | 0.069            |
| Purpura                                                                   | 22.5 (9)  | 13.5 (17) | 32.8 (76)  | 1.69 (0.79, 3.95)            | 0.194            | 0.54 (0.22, 1.40)            | 0.189        | <b>0.32 (0.17, 0.58)</b> | <b>&lt;0.001</b> |
| Skin nodules                                                              | 7.5 (3)   | 4.0 (5)   | 8.6 (20)   | 1.16 (0.37, 5.16)            | 0.816            | 0.62 (0.14, 3.15)            | 0.524        | 0.53 (0.17, 1.39)        | 0.228            |
| Infarct (nail edge lesion, splinter hemorrhage)                           | 2.5 (1)   | 1.6 (2)   | 5.2 (12)   | 2.14 (0.39, 39.77)           | 0.476            | 0.80 (0.07, 17.73)           | 0.861        | 0.38 (0.06, 1.46)        | 0.214            |
| Ulcer (full-thickness necrosis)                                           | 0.0 (0)   | 0.8 (1)   | 3.4 (8)    | -                            | -                | -                            | -            | 0.21 (0.01, 1.21)        | 0.147            |
| Gangrene (extensive necrosis)                                             | 0.0 (0)   | 0.0 (0)   | 1.3 (3)    | -                            | -                | -                            | -            | -                        | -                |
| Other skin vasculitis                                                     | 0.0 (0)   | 0.0 (0)   | 0.0 (0)    | -                            | -                | -                            | -            | -                        | -                |
| Mucous membranes/ocular involvement                                       | 27.5 (11) | 20.6 (26) | 39.2 (91)  | 1.69 (0.82, 3.71)            | 0.165            | 0.67 (0.30, 1.57)            | 0.337        | <b>0.39 (0.23, 0.66)</b> | <b>&lt;0.001</b> |
| Mouth ulcers/granulomata                                                  | 0.0 (0)   | 4.0 (5)   | 18.5 (43)  | -                            | -                | -                            | -            | <b>0.18 (0.06, 0.45)</b> | <b>&lt;0.001</b> |
| Genital ulcers                                                            | 0.0 (0)   | 0.8 (1)   | 0.4 (1)    | -                            | -                | -                            | -            | 1.51 (0.06, 40.10)       | 0.777            |
| Adnexal inflammation                                                      | 0.0 (0)   | 0.0 (0)   | 0.0 (0)    | -                            | -                | -                            | -            | -                        | -                |
| Significant proptosis                                                     | 0.0 (0)   | 0.0 (0)   | 0.0 (0)    | -                            | -                | -                            | -            | -                        | -                |
| Red eye (epi)scleritis                                                    | 5.0 (2)   | 3.2 (4)   | 10.8 (25)  | 2.02 (0.56, 12.97)           | 0.356            | 0.75 (0.14, 5.60)            | 0.745        | 0.37 (0.10, 1.02)        | 0.079            |
| Red eye conjunctivitis/blepharitis/keratitis                              | 7.5 (3)   | 6.3 (8)   | 12.5 (29)  | 1.61 (0.53, 7.02)            | 0.453            | 0.83 (0.22, 4.02)            | 0.800        | 0.52 (0.21, 1.18)        | 0.134            |
| Uveitis                                                                   | 5.0 (2)   | 0.0 (0)   | 3.9 (9)    | 0.67 (0.16, 4.57)            | 0.623            | -                            | -            | -                        | -                |
| Blurred vision                                                            | 15.0 (6)  | 4.8 (6)   | 3.0 (7)    | <b>0.18 (0.06, 0.61)</b>     | <b>0.004</b>     | 0.30 (0.09, 1.05)            | 0.056        | 1.65 (0.50, 5.29)        | 0.394            |
| Sudden visual loss                                                        | 0.0 (0)   | 0.0 (0)   | 0.0 (0)    | -                            | -                | -                            | -            | -                        | -                |
| Retinal vasculitis/retinal vessel thrombosis/retinal exudates/hemorrhages | 0.0 (0)   | 0.0 (0)   | 0.4 (1)    | -                            | -                | -                            | -            | -                        | -                |
| ENT involvement                                                           | 30.0 (12) | 27.8 (35) | 70.3 (163) | <b>5.55 (2.71, 12.01)</b>    | <b>&lt;0.001</b> | 1.00 (0.46, 2.28)            | 0.991        | <b>0.18 (0.11, 0.30)</b> | <b>&lt;0.001</b> |
| Bloody nasal discharge/crusts/ulcers/granuloma                            | 12.5 (5)  | 15.9 (20) | 54.3 (126) | <b>8.29 (3.40, 24.88)</b>    | <b>&lt;0.001</b> | 1.45 (0.54, 4.65)            | 0.490        | <b>0.18 (0.10, 0.30)</b> | <b>&lt;0.001</b> |
| Paranasal sinus involvement                                               | 10.0 (4)  | 15.1 (19) | 37.9 (88)  | <b>5.88 (2.24, 20.28)</b>    | <b>0.001</b>     | 1.80 (0.62, 6.56)            | 0.319        | <b>0.31 (0.17, 0.54)</b> | <b>&lt;0.001</b> |
| Subglottic stenosis/hoarseness/stridor                                    | 12.5 (5)  | 4.8 (6)   | 8.6 (20)   | 0.69 (0.25, 2.19)            | 0.483            | 0.41 (0.11, 1.52)            | 0.165        | 0.60 (0.21, 1.49)        | 0.298            |
| Conductive hearing loss                                                   | 0.0 (0)   | 1.6 (2)   | 12.1 (28)  | -                            | -                | -                            | -            | <b>0.13 (0.02, 0.46)</b> | <b>0.007</b>     |
| Sensorineural hearing loss                                                | 2.5 (1)   | 1.6 (2)   | 3.0 (7)    | 1.13 (0.19, 21.65)           | 0.912            | 0.82 (0.08, 17.97)           | 0.870        | 0.72 (0.10, 3.19)        | 0.695            |
| Chest involvement                                                         | 30.0 (12) | 43.7 (55) | 49.6 (115) | <b>2.20 (1.08, 4.70)</b>     | <b>0.034</b>     | 1.95 (0.92, 4.36)            | 0.090        | 0.89 (0.56, 1.41)        | 0.616            |
| Wheeze or expiratory dyspnea                                              | 7.5 (3)   | 7.9 (10)  | 7.8 (18)   | 0.97 (0.31, 4.33)            | 0.968            | 1.18 (0.33, 5.53)            | 0.811        | 1.21 (0.50, 2.79)        | 0.658            |
| Endobronchial/endotracheal involvement                                    | 5.0 (2)   | 0.8 (1)   | 3.0 (7)    | 0.65 (0.15, 4.48)            | 0.596            | 0.17 (0.01, 1.81)            | 0.150        | 0.26 (0.01, 1.53)        | 0.212            |
| Nodules or cavities                                                       | 0.0 (0)   | 0.0 (0)   | 0.0 (0)    | -                            | -                | -                            | -            | -                        | -                |
| Pleural effusion/pleurisy                                                 | 7.5 (3)   | 10.3 (13) | 9.9 (23)   | 1.35 (0.44, 5.93)            | 0.641            | 1.67 (0.50, 7.67)            | 0.445        | 1.24 (0.57, 2.60)        | 0.574            |
| Infiltrate                                                                | 0.0 (0)   | 0.0 (0)   | 0.0 (0)    | -                            | -                | -                            | -            | -                        | -                |
| Massive hemoptysis/alveolar hemorrhage                                    | 15.0 (6)  | 28.6 (36) | 34.9 (81)  | <b>2.83 (1.21, 7.77)</b>     | <b>0.026</b>     | 2.39 (0.97, 6.84)            | 0.076        | 0.85 (0.51, 1.39)        | 0.513            |
| Respiratory failure                                                       | 12.5 (5)  | 5.6 (7)   | 12.1 (28)  | 0.88 (0.34, 2.73)            | 0.799            | 0.46 (0.14, 1.66)            | 0.215        | 0.53 (0.20, 1.23)        | 0.159            |
| Cardiovascular involvement                                                | 12.5 (5)  | 0.8 (1)   | 3.4 (8)    | <b>0.25 (0.08, 0.89)</b>     | <b>0.024</b>     | <b>0.04 (1.90e-03, 0.27)</b> | <b>0.005</b> | 0.15 (0.01, 0.93)        | 0.088            |

|                                                                 |           |            |            |                           |                  |                            |                  |                          |                  |
|-----------------------------------------------------------------|-----------|------------|------------|---------------------------|------------------|----------------------------|------------------|--------------------------|------------------|
| Loss of pulses                                                  | 2.5 (1)   | 0.0 (0)    | 0.9 (2)    | 0.29 (0.03, 6.44)         | 0.323            | -                          | -                | -                        | -                |
| Bruits over accessible arteries                                 | 0.0 (0)   | 0.0 (0)    | 0.9 (2)    | -                         | -                | -                          | -                | -                        | -                |
| Blood pressure discrepancy                                      | 0.0 (0)   | 0.0 (0)    | 0.0 (0)    | -                         | -                | -                          | -                | -                        | -                |
| Caudication of extremities                                      | 5.0 (2)   | 0.0 (0)    | 0.9 (2)    | 0.17 (0.02, 1.50)         | 0.087            | -                          | -                | -                        | -                |
| Ischaemic cardiac pain                                          | 0.0 (0)   | 0.0 (0)    | 0.0 (0)    | -                         | -                | -                          | -                | -                        | -                |
| Cardiomyopathy                                                  | 5.0 (2)   | 0.0 (0)    | 0.0 (0)    | -                         | -                | -                          | -                | -                        | -                |
| Congestive cardiac failure                                      | 2.5 (1)   | 0.0 (0)    | 0.0 (0)    | -                         | -                | -                          | -                | -                        | -                |
| Valvular heart disease                                          | 0.0 (0)   | 0.0 (0)    | 0.0 (0)    | -                         | -                | -                          | -                | -                        | -                |
| Pericarditis                                                    | 5.0 (2)   | 0.8 (1)    | 1.3 (3)    | 0.27 (0.04, 2.13)         | 0.164            | 0.12 (0.01, 1.37)          | 0.098            | 0.44 (0.02, 3.82)        | 0.496            |
| Abdominal involvement                                           | 22.5 (9)  | 31.7 (40)  | 25.0 (58)  | 1.04 (0.48, 2.47)         | 0.919            | 1.65 (0.73, 4.03)          | 0.250            | 1.58 (0.94, 2.64)        | 0.083            |
| Abdominal pain                                                  | 15.0 (6)  | 29.4 (37)  | 22.0 (51)  | 1.48 (0.62, 4.11)         | 0.408            | 2.44 (0.99, 6.98)          | 0.069            | 1.65 (0.97, 2.81)        | 0.063            |
| Peritonitis                                                     | 0.0 (0)   | 0.0 (0)    | 0.0 (0)    | -                         | -                | -                          | -                | -                        | -                |
| Blood in stools or bloody diarrhea                              | 0.0 (0)   | 0.0 (0)    | 0.0 (0)    | -                         | -                | -                          | -                | -                        | -                |
| Bowel ischaemia                                                 | 2.5 (1)   | 0.0 (0)    | 2.2 (5)    | 1.02 (0.15, 2.00)         | 0.988            | -                          | -                | -                        | -                |
| Kidney involvement                                              | 50.0 (20) | 88.1 (111) | 77.2 (179) | <b>3.27 (1.63, 6.58)</b>  | <b>&lt;0.001</b> | <b>7.82 (3.42, 18.49)</b>  | <b>&lt;0.001</b> | <b>2.39 (1.28, 4.72)</b> | <b>0.008</b>     |
| Hypertension >95 <sup>th</sup> centile (for height)             | 17.5 (7)  | 33.3 (42)  | 19.4 (45)  | 1.04 (0.45, 2.71)         | 0.937            | 2.41 (1.02, 6.45)          | 0.058            | <b>2.33 (1.37, 3.99)</b> | <b>0.002</b>     |
| Proteinuria >0.3g/24h, >20mg/mmol creatinine                    | 30.0 (12) | 84.1 (106) | 63.4 (147) | <b>3.92 (1.92, 8.42)</b>  | <b>&lt;0.001</b> | <b>11.93 (5.29, 28.50)</b> | <b>&lt;0.001</b> | <b>3.04 (1.75, 5.49)</b> | <b>&lt;0.001</b> |
| Haematuria ≥ 2+ or 5 rbc/hpf or red blood cell casts            | 27.5 (11) | 79.4 (100) | 69.4 (161) | <b>5.72 (2.77, 12.60)</b> | <b>&lt;0.001</b> | <b>10.69 (4.78, 25.51)</b> | <b>&lt;0.001</b> | <b>1.87 (1.10, 3.26)</b> | <b>0.024</b>     |
| GFR 50-80ml/min/1.73m <sup>2</sup>                              | 10.0 (4)  | 3.2 (4)    | 5.2 (12)   | 0.48 (0.15, 1.79)         | 0.224            | 0.33 (0.07, 1.48)          | 0.134            | 0.69 (0.18, 2.13)        | 0.545            |
| GFR 15-49ml/min/1.73m <sup>2</sup>                              | 5.0 (2)   | 19.8 (25)  | 8.2 (19)   | 1.62 (0.44, 10.49)        | 0.526            | <b>4.95 (1.36, 31.91)</b>  | <b>0.036</b>     | <b>3.05 (1.55, 6.11)</b> | <b>0.001</b>     |
| GFR <15ml/min/1.73m <sup>2</sup>                                | 2.5 (1)   | 15.9 (20)  | 6.0 (14)   | 2.54 (0.49, 46.82)        | 0.374            | 7.27 (1.42, 133.14)        | 0.058            | <b>2.86 (1.34, 6.23)</b> | <b>0.007</b>     |
| Rise in creatinine >10% or Creatinine clearance (GFR) fall >25% | 0.0 (0)   | 0.8 (1)    | 0.4 (1)    | -                         | -                | -                          | -                | 1.06 (0.04, 29.32)       | 0.967            |
| Nervous system involvement                                      | 22.5 (9)  | 20.6 (26)  | 15.9 (37)  | 0.64 (0.29, 1.53)         | 0.288            | 0.99 (0.42, 2.46)          | 0.978            | 1.55 (0.85, 2.78)        | 0.145            |
| Headache                                                        | 17.5 (7)  | 13.5 (17)  | 9.1 (21)   | 0.46 (0.19, 1.25)         | 0.106            | 0.76 (0.30, 2.14)          | 0.585            | 1.65 (0.80, 3.38)        | 0.172            |
| Meningitis/encephalitis                                         | 0.0 (0)   | 0.0 (0)    | 0.0 (0)    | -                         | -                | -                          | -                | -                        | -                |
| Organic confusion/cognitive dysfunction                         | 2.5 (1)   | 1.6 (2)    | 0.4 (1)    | 0.13 (0.01, 3.54)         | 0.165            | 0.42 (0.03, 10.58)         | 0.527            | 3.10 (0.19, 80.69)       | 0.422            |
| Seizures (not hypertensive)                                     | 2.5 (1)   | 4.8 (6)    | 2.2 (5)    | 0.83 (0.13, 16.22)        | 0.868            | 1.89 (0.30, 36.79)         | 0.566            | 2.28 (0.62, 8.62)        | 0.210            |
| Stroke                                                          | 2.5 (1)   | 0.0 (0)    | 0.0 (0)    | -                         | -                | -                          | -                | -                        | -                |
| Cord lesion                                                     | 0.0 (0)   | 0.0 (0)    | 0.0 (0)    | -                         | -                | -                          | -                | -                        | -                |
| Cranial nerve palsy                                             | 0.0 (0)   | 2.4 (3)    | 4.3 (10)   | -                         | -                | -                          | -                | 0.61 (0.13, 2.12)        | 0.472            |
| Sensory peripheral neuropathy                                   | 2.5 (1)   | 1.6 (2)    | 1.3 (3)    | 0.50 (0.06, 10.84)        | 0.572            | 0.94 (0.08, 21.59)         | 0.964            | 1.87 (0.23, 12.15)       | 0.509            |
| Motor mononeuritis multiplex                                    | 0.0 (0)   | 0.8 (1)    | 0.9 (2)    | -                         | -                | -                          | -                | 0.98 (0.04, 10.62)       | 0.990            |

(-) indicates unreliable statistical results due to an insufficient sample size in one or both of the groups being compared.

Supplementary Table 5. Kidney function over the first 12 months in PR3-ANCA and MPO-ANCA positive pediatric-onset AAV.

|                         | Mean eGFR $\pm$ SD                    | Mean Difference (95 % CI) | P-value          |
|-------------------------|---------------------------------------|---------------------------|------------------|
| <b>(A) MPO-ANCA</b>     |                                       |                           |                  |
| <b>(I) Stage 1-2</b>    |                                       |                           |                  |
| 6-months vs. diagnosis  | 105.9 $\pm$ 29.1 vs. 111.0 $\pm$ 23.5 | -5.12 (-19.60, 9.35)      | 0.488            |
| 12-months vs. diagnosis | 108.3 $\pm$ 25.3 vs. 111.0 $\pm$ 23.5 | -2.50 (-17.30, 12.30)     | 0.741            |
| 12-months vs. 6-months  | 108.3 $\pm$ 25.3 vs. 105.9 $\pm$ 29.1 | 2.62 (-12.20, 17.43)      | 0.729            |
| <b>(II) Stage 3</b>     |                                       |                           |                  |
| 6-months vs. diagnosis  | 66.1 $\pm$ 21.0 vs. 44.3 $\pm$ 11.7   | 26.60 (-1.08, 54.40)      | 0.060            |
| 12-months vs. diagnosis | 74.8 $\pm$ 32.3 vs. 44.3 $\pm$ 11.7   | 30.50 (5.47, 55.60)       | <b>0.017</b>     |
| 12-months vs. 6-months  | 74.8 $\pm$ 32.3 vs. 66.1 $\pm$ 21.0   | 3.89 (-23.84, 31.60)      | 0.784            |
| <b>(III) Stage 4-5</b>  |                                       |                           |                  |
| 6-months vs. diagnosis  | 38.2 $\pm$ 32.4 vs. 13.0 $\pm$ 7.1    | 23.50 (12.57, 34.40)      | <b>&lt;0.001</b> |
| 12-months vs. diagnosis | 44.6 $\pm$ 39.4 vs. 13.0 $\pm$ 7.1    | 28.76 (17.60, 39.90)      | <b>&lt;0.001</b> |
| 12-months vs. 6-months  | 44.6 $\pm$ 39.4 vs. 38.2 $\pm$ 32.4   | 5.29 (-6.34, 16.90)       | 0.373            |
| <b>(B) PR3-ANCA</b>     |                                       |                           |                  |
| <b>(I) Stage 1-2</b>    |                                       |                           |                  |
| 6-months vs. diagnosis  | 95.6 $\pm$ 27.6 vs. 109.9 $\pm$ 25.3  | -14.97 (-22.10, -7.82)    | <b>&lt;0.001</b> |
| 12-months vs. diagnosis | 91.7 $\pm$ 27.6 vs. 109.9 $\pm$ 25.3  | -19.20 (-26.40, -11.90)   | <b>&lt;0.001</b> |
| 12-months vs. 6-months  | 91.7 $\pm$ 27.6 vs. 95.6 $\pm$ 27.6   | -4.19 (-11.80, 3.45)      | 0.283            |
| <b>(II) Stage 3</b>     |                                       |                           |                  |
| 6-months vs. diagnosis  | 61.2 $\pm$ 33.7 vs. 42.1 $\pm$ 7.6    | 20.00 (5.03, 34.90)       | <b>0.009</b>     |
| 12-months vs. diagnosis | 68.7 $\pm$ 35.9 vs. 42.1 $\pm$ 7.6    | 26.20 (10.18, 42.20)      | <b>0.001</b>     |
| 12-months vs. 6-months  | 68.7 $\pm$ 35.9 vs. 61.2 $\pm$ 33.7   | 6.22 (-9.95, 22.40)       | 0.451            |
| <b>(III) Stage 4-5</b>  |                                       |                           |                  |
| 6-months vs. diagnosis  | 25.0 $\pm$ 19.2 vs. 11.8 $\pm$ 7.1    | 12.30 (-2.27, 26.80)      | 0.098            |
| 12-months vs. diagnosis | 20.5 $\pm$ 19.3 vs. 11.8 $\pm$ 7.1    | 5.76 (-10.70, 22.20)      | 0.493            |
| 12-months vs. 6-months  | 20.5 $\pm$ 19.3 vs. 25.0 $\pm$ 19.2   | -6.49 (-23.13, 10.10)     | 0.444            |
